# Supplementary material for: Which Compounds Contribute Most to Elevated Soil Pollution and the Corresponding Health Risks in Floodplains in the Headwater Areas of the Central European Watershed?
Source: MDPI journal article supplement (doi:10.3390/ijerph15061146), 2018-06-01
Supplement: s1 [file s1]

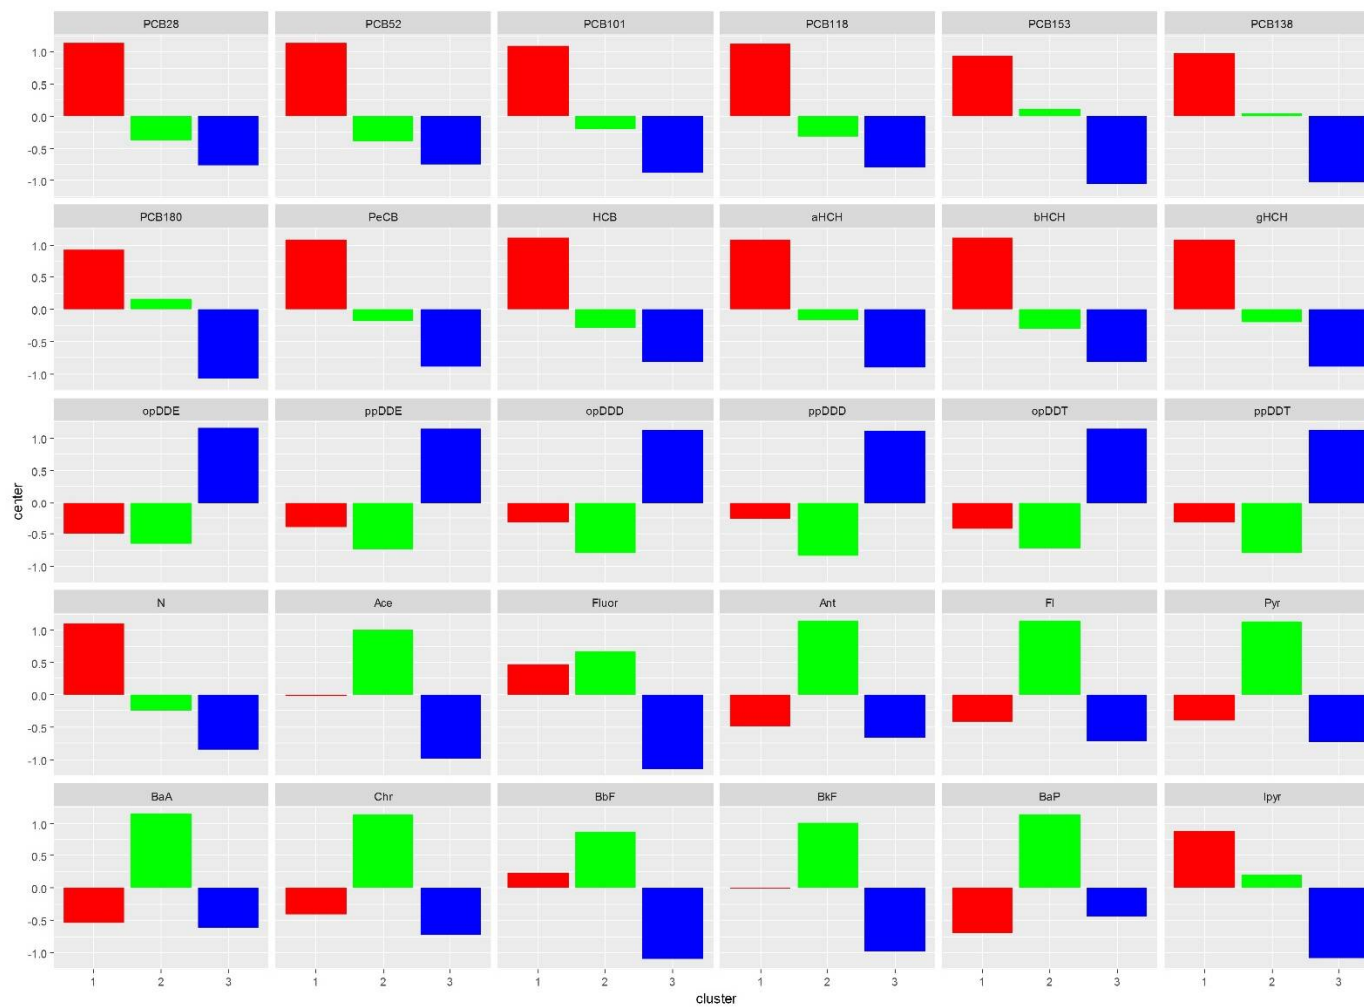

**Figure S1.** Visualization of cluster profiles: relative weights of POP components for every cluster in the robust cluster analysis (isometric log-ratio (ilr)-transformed and centered data).
